# Supplementary material
Source: HighWire-hosted journal article supplement (http://www.cmajopen.ca/highwire/filestream/81252/field_highwire_adjunct_files/2/2019-0189-original-submission.pdf)
Supplement: 2019-0189-original-submission.pdf [file 2019-0189-original-submission.pdf]

## Fees for Uninsured Services: A Descriptive Study of Ontario Family Physicians

Jamie R. Daw, PhD\*

Department of Health Policy and Management

Columbia University Mailman School of Public Health

722 W 168<sup>th</sup> St, 4<sup>th</sup> Floor, New York, NY, 10032

Email: [jrd2199@columbia.edu](mailto:jrd2199@columbia.edu)

Phone: (212) 305-3635

Fax: (212) 305-3405

*\*corresponding author*

Kaitlyn E. Rice, BA

Department of Health Policy and Management

Columbia University Mailman School of Public Health

722 W 168<sup>th</sup> St, 4<sup>th</sup> Floor, New York, NY, 10032

Email: [kaitlyn.rice@columbia.edu](mailto:kaitlyn.rice@columbia.edu)

Danyaal Raza, MD, MPH, CCFP

Department of Family and Community Medicine, Faculty of Medicine, University of Toronto

500 University Ave, Toronto, ON, M5G 1V7

Department of Family and Community Medicine, St. Michael's Hospital

61 Queen St E, Toronto, ON, M5C 2T2

Email: [danyaal.raza@utoronto.ca](mailto:danyaal.raza@utoronto.ca)

**Study Type:** Survey

### Contributor Statement

Jamie Daw conceived the study idea; Jamie Daw, Danyaal Raza and Kaitlyn Rice contributed to study design and protocol development. Jamie Daw and Kaitlyn Rice performed data collection and analyzed the data. Jamie Daw drafted the manuscript; Danyaal Raza and Kaitlyn Rice revised it for importance intellectual content and approved the manuscript in its final form. All authors agree to act as guarantors of the work.

1  
2  
3 38 **Abstract**  
4  
5

6 39 **Background:** A range of medical and administrative family physician services are not  
7  
8  
9 40 covered by public health insurance in Canada. Physicians may charge fees for these  
10  
11 41 uninsured services; however, the prevalence of fees in primary care is unknown.  
12  
13

14 42 **Methods:** Cross-sectional telephone audit study of a random sample of 275 family  
15  
16  
17 43 physicians licensed to practice in Ontario, Canada.  
18

19 44 **Results:** The majority of Ontario family physicians charged fees for uninsured services.  
20  
21  
22 45 Fifty-eight percent charged per-service provided (95% CI: 50.6, 65.8), 20.3% offered  
23  
24  
25 46 patients the option to pay an annual block fee for all uninsured services rendered (95%  
26  
27  
28 47 CI: 14.8, 27.3), and 11.3% charged no fees (95% CI: 7.4, 17.3). Fee structures varied by  
29  
30  
31 48 geography but not physician payment model.  
32

33 49 **Interpretation:** Further research is needed to examine patient and physician perceptions  
34  
35  
36 50 of user fees, potential adverse consequences, and opportunities for government funding  
37  
38  
39 51 of commonly used uninsured services.  
40

41 52  
42  
43  
44  
45  
46  
47  
48  
49  
50  
51  
52  
53  
54  
55  
56  
57  
58  
59  
60

## 53 Introduction

54 The Canada Health Act prohibits physicians from charging user fees for services  
55 covered by each province's universal, public health insurance program. However, there  
56 are a wide range of medical and administrative "uninsured services" commonly  
57 provided by family physicians that are not covered by public insurance, such as  
58 prescription renewals outside of an office visit and completion of certain forms. Family  
59 physicians can choose to provide these services at no cost, for a per-service charge ("à la  
60 carte") or by a "block fee" that covers all uninsured services for a patient or family for  
61 one year.

62  
63 The Ontario Medical Association provides guidance on uninsured services and  
64 suggested billing rates.<sup>(1)</sup> Since this guidance is not legally binding, it is likely that fee  
65 rates, patient communication, and administrative procedures vary widely. There is  
66 anecdotal evidence that an increasing number of family physicians in Ontario, Canada's  
67 largest province, are opting to charge annual block fees. However, no study has  
68 examined the prevalence of charges for uninsured services in any Canadian province.  
69 This information could inform provincial coverage decisions for currently uninsured  
70 services, as well as guidance and regulatory decisions related to the use of patient fees  
71 in Canada. Thus, the objective of this study was to estimate the prevalence of different

1  
2  
3 72 fee practices for uninsured services among Ontario family physicians and to document  
4  
5  
6 73 variation in fee practices by geography and payment model.  
7

8  
9 74

## 11 75 **Methods**

14 76 We conducted an observational, audit study where researchers telephoned family  
15  
16  
17 77 physician practices in Ontario to ask about current fee structures for uninsured services.  
18

19 78 We obtained contact information for 16,189 family physicians licensed to practice in  
20

21  
22 79 Ontario from the College of Physicians and Surgeons of Ontario (CPSO) public  
23

24  
25 80 website.(2) We linked practice addresses to geographic areas defined by Statistics  
26

27  
28 81 Canada (large urban centre (population >100,000), small/medium centre (1,000-99,999),  
29

30 82 or rural area); physician payment model information (traditional/enhanced fee-for-  
31

32  
33 83 service or capitation-based) from the Government of Ontario website and postal-code  
34

35  
36 84 (forward sortation area) level sociodemographics from the 2016 Census.(3-5) From this  
37

38 85 sampling frame, we drew a random sample of 275 physicians.  
39

40  
41 86  
42

43  
44 87 We excluded physicians with missing contact information, additional specialties, or  
45

46 88 whose primary practice was outside of Ontario; a walk-in clinic; an emergency  
47

48  
49 89 department; an organization that cares only for a specific population (e.g. nursing  
50

51  
52 90 home) or does not provide care (e.g. insurance company). The final sample included 221  
53

54  
55 91 physicians.  
56  
57  
58  
59  
60

1  
2  
3 92  
4  
5  
6 93 A trained research assistant conducted calls to physician offices using a structured  
7  
8  
9 94 script from April to July 2019 (Appendices A-B). Physician offices were asked about  
10  
11 95 current fee arrangements for uninsured services. If physicians offered an annual block  
12  
13  
14 96 fee, they were asked to provide fee amounts, examples of the services covered, and  
15  
16  
17 97 whether patient payment of the block fee conferred any other benefits (beyond  
18  
19  
20 98 uninsured services) to the patient. Two contact attempts were made resulting in a  
21  
22 99 response rate of 75% (166 physicians). Of the 55 physicians that did not respond, 42 did  
23  
24  
25 100 not answer the phone and 13 had incorrect contact information. We calculated survey  
26  
27  
28 101 weights to account for non-response and to ensure representativeness of the sample by  
29  
30  
31 102 geography and payment model. We tested variation in fee structures across physician  
32  
33 103 and area-level characteristics tested using survey-adjusted chi-squared and F-tests. This  
34  
35  
36 104 study was approved by the Columbia University Medical Centre Institutional Review  
37  
38 105 Board (Protocol #AAAS2855).

40  
41 106  
42  
43

## 44 107 **Results**

45  
46 108 Table 1 reports the characteristics of the sample. Of the 166 physicians who responded,  
47  
48  
49 109 112 (weighted prevalence: 71.9%) had a primary practice location in a large urban  
50  
51  
52 110 centre, 29 (18.7%) in a small-medium centre and 25 (9.4%) in a rural area. The majority  
53  
54  
55 111 of physicians (127 physicians; 80.3%) were paid through a traditional or enhanced fee-

1  
2  
3 112 for-service model (e.g. Ontario Family Health Groups); the remaining 39 physicians  
4  
5  
6 113 (19.7%) were paid through a capitation-based model (the Ontario Family Health  
7  
8  
9 114 Networks and Family Health Organizations). The characteristics of this sample are  
10  
11 115 consistent with other descriptive data on Ontario's primary care workforce.(6,7)  
12  
13

14 116  
15  
16  
17 117 Table 2 reports the prevalence of fee structures overall, by geography, and by payment  
18  
19 118 model. One in five family physicians reported that they offer patients the option of  
20  
21  
22 119 paying an annual block fee for uninsured services (20.3%, 95% CI: 14.8, 27.3), 58%  
23  
24  
25 120 charged only à la carte (50.6, 65.8), and 11% charged no fees (7.4, 17.3). All physicians  
26  
27  
28 121 that offered a block fee also gave patients the option to pay à la carte. Fee structures did  
29  
30 122 not vary significantly physician payment models. However, fee structures were  
31  
32  
33 123 significantly different across levels of geography ( $p=0.04$ ; Figure 1). Twenty-five percent  
34  
35  
36 124 of physicians in large urban areas reported charging block fees (17.8, 33.9) compared to  
37  
38 125 10.4% (3.4, 27.8) and 4.5% (1.2, 15.5) in rural areas. Physicians who charged block fees  
39  
40  
41 126 were more likely to practice in areas with a lower proportion of seniors compared to  
42  
43  
44 127 those who did not; however, there were no differences in area-level income across fee  
45  
46 128 structures (Table A1).

47  
48  
49 129  
50  
51  
52 130 Of those that charged block fees, the mean annual amount was \$106 (95% CI: \$92, \$121)  
53  
54  
55 131 for an individual and \$194 (95% CI: \$171, \$217) for a family (Figure 2). The most  
56  
57  
58  
59  
60

1  
2  
3 132 commonly reported services covered by the fee were form completion, doctor's notes,  
4  
5  
6 133 and prescription renewals (by telephone or email). All 33 practices that charged a block  
7  
8  
9 134 fee reported that payment would not provide additional benefits to the patient such as  
10  
11 135 improved access to the physician.  
12  
13

14 136

15  
16  
17 137 **Interpretation**  
18

19 138 To our knowledge, this is the first study to document the prevalence of fees charged for  
20  
21  
22 139 uninsured services by Canadian family physicians. We found that most of physicians  
23  
24  
25 140 charge some fees for uninsured services. The majority charge patients à la carte and 1 in  
26  
27  
28 141 5 offer patients the option to pay an annual block fee for all uninsured services rendered  
29  
30 142 at their practice.  
31  
32

33 143

34  
35  
36 144 The study did not capture physician or patient perceptions of patient fees. Further, since  
37  
38  
39 145 we used publicly available data, limited information was available to explore variation  
40  
41 146 in fees across physician characteristics. The findings of this study may not be  
42  
43  
44 147 generalizable to other provinces; more research is needed to explore variation in  
45  
46  
47 148 uninsured fee practices across Canada.  
48

49 149

50  
51  
52 150 The high prevalence of fees observed suggests that more research is needed to examine  
53  
54  
55 151 how patients experience fees and their potential consequences. While patients are not  
56  
57  
58  
59  
60

1  
2  
3 152 obligated to pay block fees, if physicians do not communicate their purpose clearly, this  
4  
5  
6 153 could cause confusion and adverse consequences for patients. This is a particular  
7  
8  
9 154 concern in a context where patients are not accustomed to charges for medical services.  
10  
11 155 For example, patients who receive a letter requesting that they pay a block fee may  
12  
13  
14 156 reduce care seeking or seek out another family doctor (which can be difficult to obtain)  
15  
16  
17 157 if they believe that their failure to pay the block fee affects their standing as a patient.  
18  
19 158 Conversely, patients may pay the block fee when it is unnecessary if they believe  
20  
21  
22 159 payment will affect physician access. If it is unclear why fees are charged and by whom,  
23  
24  
25 160 block fees may also undermine patient trust and confidence in the public health care  
26  
27  
28 161 system.

29  
30 162  
31  
32  
33 163 The CPSO emphasizes these concerns in their regulatory policies, stating doctors “must  
34  
35  
36 164 ensure that patient decisions regarding whether to pay a block fee do not affect their ability or the  
37  
38 165 ability of other patients in the practice to access health-care services.”(8) While this study  
39  
40 166 estimated the prevalence of block fees, current communication and administrative practices  
41  
42  
43 167 around block fees remains unknown.

44  
45 168  
46  
47  
48 169 Finally, the widespread use of fees for uninsured services may be reason for provincial  
49  
50  
51 170 governments to consider whether public coverage is warranted for some uninsured  
52  
53 171 services. Insuring commonly used services could reduce the financial burden faced by  
54  
55  
56 172 patients and in some cases, may direct patients to more cost-effective services. For



1  
2  
3 173 example, reimbursement for electronic or telephone prescription renewal in addition to  
4  
5  
6 174 in-office renewals may improve patient adherence to medicines and be less costly for  
7  
8  
9 175 the health system.

10  
11 176

## 12 177 **Acknowledgments**

13  
14  
15 178 No acknowledgements to report.

16  
17  
18 179

## 19 180 **Conflict of Interest Statement**

20  
21  
22 181 The authors have no conflicts of interest to declare.

23  
24  
25 182

## 26 183 **References**

- 27  
28  
29  
30 184 1. Ontario Medical Association. Physician's guide to uninsured services: A guide for  
31 185 Ontario physicians [Internet]. 2019 p. 1–52. Available from:  
32 186 [http://swpca.ca/Uploads/ContentDocuments/2019-Physicians-Guide-to-Uninsured-](http://swpca.ca/Uploads/ContentDocuments/2019-Physicians-Guide-to-Uninsured-Services-10Jan19%20(004).pdf)  
33 187 [Services-10Jan19%20\(004\).pdf](http://swpca.ca/Uploads/ContentDocuments/2019-Physicians-Guide-to-Uninsured-Services-10Jan19%20(004).pdf)  
34  
35  
36 188 2. College of Physicians and Surgeons of Ontario. Find a Doctor [Internet]. [cited 2019  
37 189 Feb 5]. Available from: <https://doctors.cpso.on.ca/?search=general>  
38  
39  
40 190 3. Statistics Canada. Population Centre and Rural Area Classification 2016 [Internet].  
41 191 2017 [cited 2019 Feb 15]. Available from:  
42 192 <https://www.statcan.gc.ca/eng/subjects/standard/pcrac/2016/introduction>  
43  
44  
45 193 4. Ontario Ministry of Health and Long-Term Care. Primary Care Payment Models in  
46 194 Ontario [Internet]. 2019 [cited 2019 Feb 5]. Available from:  
47 195 <http://www.health.gov.on.ca/en/pro/programs/pcpm/>  
48  
49  
50 196 5. Statistics Canada. Census Profile, 2016 Census [Internet]. 2019 [cited 2019 Jul 22].  
51 197 Available from: [https://www12.statcan.gc.ca/census-recensement/2016/dp-](https://www12.statcan.gc.ca/census-recensement/2016/dp-pd/prof/index.cfm?Lang=E)  
52 198 [pd/prof/index.cfm?Lang=E](https://www12.statcan.gc.ca/census-recensement/2016/dp-pd/prof/index.cfm?Lang=E)  
53  
54  
55  
56  
57  
58  
59  
60

1  
2  
3  
4  
5  
6  
7  
8  
9  
10  
11  
12  
13  
14  
15  
16  
17  
18  
19  
20  
21  
22  
23  
24  
25  
26  
27  
28  
29  
30  
31  
32  
33  
34  
35  
36  
37  
38  
39  
40  
41  
42  
43  
44  
45  
46  
47  
48  
49  
50  
51  
52  
53  
54  
55  
56  
57  
58  
59  
60

199 6. McLeod L, Buckley G, Sweetman A. Ontario primary care models: a descriptive  
200 study. *CMAJ Open*. 2016 Nov 22;4(4):E679–88.

201 7. Wenghofer EF, Kam SM, Timony PE, Strasser R, Sutinen J. Geographic variation in  
202 FP and GP scope of practice in Ontario. *Can Fam Physician*. 2018 Jun;64(6):e274–82.

203 8. College of Physicians and Surgeons of Ontario. Uninsured Services: billing and block  
204 fees [Internet]. 2017 [cited 2019 Jun 30]. Available from:  
205 [https://www.cpso.on.ca/Physicians/Policies-Guidance/Policies/Uninsured-Services-](https://www.cpso.on.ca/Physicians/Policies-Guidance/Policies/Uninsured-Services-Billing-and-Block-Fees)  
206 [Billing-and-Block-Fees](https://www.cpso.on.ca/Physicians/Policies-Guidance/Policies/Uninsured-Services-Billing-and-Block-Fees)

207

208

Confidential

209 **Tables and Figures**

210

211 **Table 1** Sample Characteristics

|                                           | Sample Size | Unweighted Prevalence (%) | Weighted Prevalence (%) |
|-------------------------------------------|-------------|---------------------------|-------------------------|
| <b>Geography</b>                          |             |                           |                         |
| Large Urban                               | 112         | 67.5                      | 71.9                    |
| Small/Medium                              | 29          | 17.5                      | 18.7                    |
| Rural                                     | 25          | 15.1                      | 9.4                     |
| <b>Payment Model</b>                      |             |                           |                         |
| Fee-For-Service (Traditional or Enhanced) | 127         | 76.5                      | 80.3                    |
| Capitation-Based                          | 39          | 23.5                      | 19.7                    |
| <b>Total</b>                              | <b>166</b>  |                           |                         |

212

213

214

215

215 **Table 2** Fees for Uninsured Services by Physician Characteristics

216

|                      | Block Fee |                   | À La Carte Only |                   | No Fees |                   | Unknown |                  | P-Value |
|----------------------|-----------|-------------------|-----------------|-------------------|---------|-------------------|---------|------------------|---------|
|                      | n         | % (95% CI)        | n               | % (95% CI)        | n       | % (95% CI)        | n       | % (95% CI)       |         |
| <b>Total</b>         | 33        | 20.3 (14.8, 27.3) | 97              | 58.3 (50.6, 65.8) | 19      | 11.4 (7.4, 17.3)  | 17      | 9.7 (6.1, 15.3)  | -       |
| <b>Geography</b>     |           |                   |                 |                   |         |                   |         |                  |         |
| Large Urban          | 28        | 25.0 (17.8, 33.9) | 64              | 57.1 (47.8, 66.0) | 10      | 8.9 (4.9, 15.8)   | 10      | 8.9 (4.9, 15.8)  | 0.04    |
| Small/Medium         | 3         | 10.4 (3.4, 27.8)  | 20              | 68.9 (50.2, 83.0) | 4       | 13.9 (5.3, 31.6)  | 2       | 6.9 (1.7, 23.6)  |         |
| Rural                | 2         | 4.5 (1.2, 15.5)   | 13              | 47.5 (27.3, 68.5) | 5       | 25.8 (10.9, 49.7) | 5       | 22.2 (8.7, 46.0) |         |
| <b>Payment Model</b> |           |                   |                 |                   |         |                   |         |                  |         |
| Fee-For-Service      | 25        | 19.4 (13.9, 27.8) | 74              | 58.5 (49.7, 66.7) | 15      | 11.5 (7.1, 18.2)  | 13      | 10.0 (5.9, 16.5) | 0.99    |
| Capitation-Based     | 8         | 22.0 (10.8, 39.5) | 23              | 58.2 (40.9, 73.7) | 4       | 11.0 (3.9, 27.4)  | 4       | 8.8 (2.9, 23.7)  |         |

217

218 *Notes:* Unweighted sample sizes and weighted prevalence. Statistical significance from  
 219 survey design-based Pearson chi square statistic.

220

221

1  
2  
3  
4  
5  
6  
7  
8  
9  
10  
11  
12  
13  
14  
15  
16  
17  
18  
19  
20  
21  
22  
23  
24  
25  
26  
27  
28  
29  
30  
31  
32  
33  
34  
35  
36  
37  
38  
39  
40  
41  
42  
43  
44  
45  
46  
47  
48  
49  
50  
51  
52  
53  
54  
55  
56  
57  
58  
59  
60

222

Confidential

223 **Figure 1** Prevalence of family physician fees for uninsured services, total and by  
 224 geography

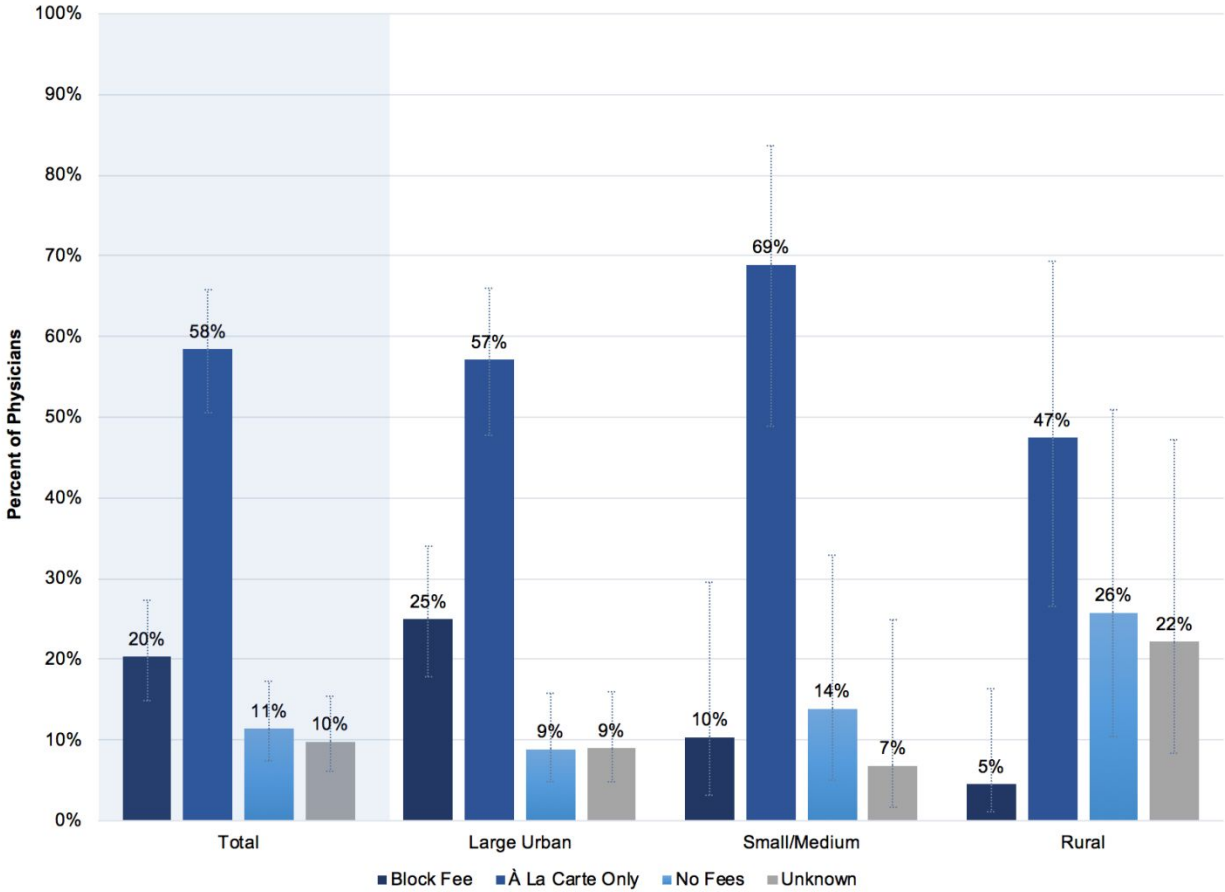

225  
 226  
 227 *Notes:* Weighted prevalence. Error bars represent 95 percent confidence intervals. All  
 228 physicians that offered a block fee also gave patients the option to pay à la carte.

231 **Figure 2** Distribution of family physician annual block fees for uninsured services

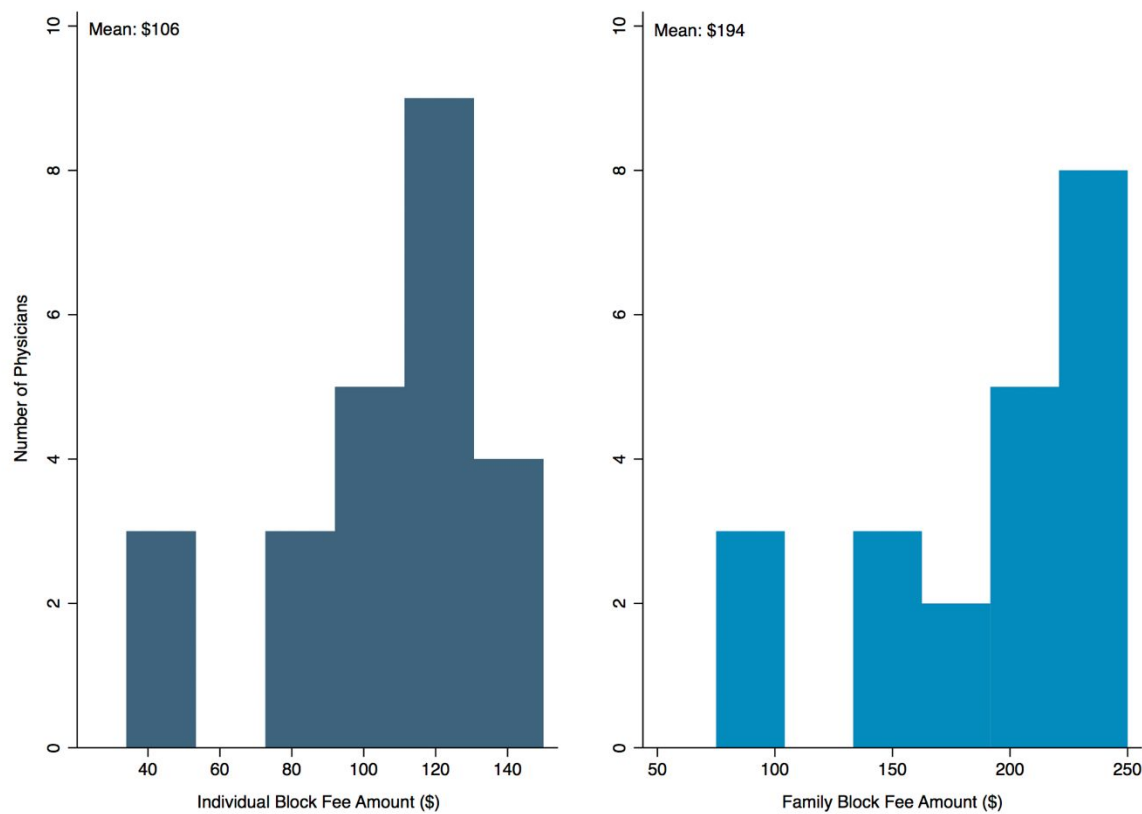

232  
233  
234

ential

**APPENDIX A  
TELEPHONE SCRIPT**

**Q1:** Hello, I'm calling to ask whether [DOCTOR NAME] offers the option for patients to pay an annual block fee for uninsured services?

▪ **IF PHYSICIAN DOES NOT CHARGE BLOCK FEES →**

*Q8. OK, thank you. Do you charge patients per-service for uninsured services not covered by OHIP [Ontario Health Insurance Program]? For example, would you charge a fee if a patient needed a form filled out for their employer or insurer?*

*If YES -> Thank you – that's all I need to know for now. Thanks for your help.*

*If NO -> Do you ever charge fees for uninsured services?*

END -> Thank you – that's all I need to know for now. Thanks for your help.

▪ **IF PHYSICIAN CHARGES BLOCK FEES →**

*Q3. How much is the fee per year?*

*Q4. Does that cover an individual or family?*

*Q5. What services does the annual fee cover?*

*Q6. If a patient pays the fee, are there any other benefits, such as being able to get an appointment more quickly?*

*Q7. Roughly how long has the physician charged a block fee?*

*Q8. Do you also give patients the option to pay per-service (à la carte)? For example, would you charge a fee if a patient needed a form filled out for their employer or insurer?*

END -> Thank you – that's all I need to know for now. Thanks for your help.

AFTER THE CALL: IMMEDIATELY FILL OUT POST-CALL EVALUATION

POTENTIAL QUESTIONS AND RESPONSES

→ IF YOU ARE ASKED...

277 Who is calling/Who are you? *I am a researcher from [University Name]. We are conducting a study on*  
 278 *the use of block fees for uninsured services among family physicians in Ontario.*

280 What is a block fee? *Block fees are annual fees charged by physicians for services that are not covered by*  
 281 *OHIP such as sick notes, providing copies of medical records, or providing prescription refills and*  
 282 *medical advice over the phone or email. Instead of charging patients for each uninsured service provided,*  
 283 *the physician gives patients the option to pay an annual fee that would cover all of these uninsured*  
 284 *services for one year.*

285  
 286 **APPENDIX B**  
 287 **POST CALL EVALUATION FORM**  
 288

|                 |             |                                                                                    |
|-----------------|-------------|------------------------------------------------------------------------------------|
| <b>STUDY ID</b> | <b>DATE</b> | <input type="checkbox"/> <b>CALL #1</b><br><input type="checkbox"/> <b>CALL #2</b> |
|-----------------|-------------|------------------------------------------------------------------------------------|

289  
 290 **Q1. Were you able to connect to a receptionist?**

- 291  **Yes -> PROCEED TO Q2**  
 292  No – No one answered the phone  
 293  No – Phone number was incorrect  
 294  No – Other. *Describe:*

295  
 296 **Q2. Does this physician offer a block fee for uninsured services?**

- 297  **Yes -> PROCEED TO Q4**  
 298  **No -> PROCEED TO Q8**  
 299  Don't know  
 300  Refused  
 301  Other. *Describe:*

302  
 303 **Q4. What is the annual amount of the block fee?**

- 304  Individual adult: \$\_\_\_\_\_
- 305  Family, if provided: \$\_\_\_\_\_ [optional]
- 306  Definition of family, if provided: \_\_\_\_\_ [optional]
- 307  Don't know
- 308  Refused

309  
 310 **Q5. What services does the block fee cover? Indicate all services mentioned.**

- 311  Uninsured services (no specific services mentioned)
- 312  Sick notes
- 313  Other forms (e.g. back to work, disability tax credit, fitness club, certificate of fitness)
- 314  Prescription renewal
- 315  Electronic communication with the physician



316  Travel vaccines and immunization records

317  Other. *Describe:*

[Empty text box for description]

318

319 **Q6. Will payment of the block fee provide any other benefits to the patient?**

320  Yes → PROCEED TO Q7

321  Maybe → PROCEED TO Q7

322  No

323  Don't know

324  Refused

325  Other. *Describe:*

[Empty text box for description]

326

327 **Q7. How would payment of the block fee provide other benefits to the patient? Describe.**

[Large empty text box for description]

328

329 **Q8. Does the practice charge patients à la carte for uninsured services?**

330  Yes

331  No [No fees are charged to patients for uninsured services]

332  Don't know

333  Refused

334  Other. *Describe*

[Empty text box for description]

335

336 **Additional notes:**

[Large empty text box for additional notes]

337

338

339

1  
2  
3  
4  
5  
6  
7  
8  
9  
10  
11  
12  
13  
14  
15  
16  
17  
18  
19  
20  
21  
22  
23  
24  
25  
26  
27  
28  
29  
30  
31  
32  
33  
34  
35  
36  
37  
38  
39  
40  
41  
42  
43  
44  
45  
46  
47  
48  
49  
50  
51  
52  
53  
54  
55  
56  
57  
58  
59  
60

## APPENDIX C: ADDITIONAL RESULTS

340  
341  
342 **Table A1** Area-Level Demographics by Fee Structure  
343

| Area-Level Demographics <sup>§</sup>     | Block Fee                           | À La Carte Only                     | No Fees                             | Unknown                             | P-Value |
|------------------------------------------|-------------------------------------|-------------------------------------|-------------------------------------|-------------------------------------|---------|
| Mean Age                                 | 39.9<br>(39.0, 40.7)                | 41.2<br>(40.5, 41.9)                | 40.3<br>(38.6, 41.9)                | 41.4<br>(39.7, 43.0)                | 0.09    |
| % Population Over Age 65                 | 14.5<br>(13.3, 15.7)                | 17.2<br>(16.2, 18.2)                | 15.9<br>(13.3, 18.4)                | 17.9<br>(15.4, 20.4)                | 0.01    |
| Mean After-Tax Household Income          | \$81 416<br>(\$74 707,<br>\$88 125) | \$77 927<br>(\$73 591,<br>\$82 263) | \$79 683<br>(\$71 911,<br>\$87 455) | \$72 706<br>(\$62 971,<br>\$82 440) | 0.53    |
| % After-Tax Low Income<br>(Adults 18-64) | 15.9<br>(13.5, 18.4)                | 15.5<br>(13.8, 17.2)                | 13.5<br>(10.0, 17.0)                | 18.6<br>(14.9, 22.2)                | 0.27    |

344  
345 *Notes:* Weighted proportions and means. Statistical significance from survey-weighted F-test. <sup>§</sup>Area level  
346 demographics are measured at the forward sortation area level (first three digits of the postal code).  
347  
348  
349

350 **Table A2** Individual and Family Block Fee Amounts

|            | Mean  | 95% CI         | Range    | Unknown<br>(N, %) |
|------------|-------|----------------|----------|-------------------|
| Individual | \$106 | (\$92, \$121)  | \$34-150 | 9 (27%)           |
| Family     | \$194 | (\$171, \$217) | \$75-250 | 12 (36%)          |

351  
352 *Notes:* Weighted means and 95% confidence intervals.  
353  
354  
355
